# Supplementary material for: Genome-wide characterization and functional identification of MYB genes in Malus sieversii infected by Valsa mali
Source: Front Plant Sci. 2023 Apr 5;14:1112681. doi: 10.3389/fpls.2023.1112681 (PMC10113540; doi:10.3389/fpls.2023.1112681)
Supplement: Supplementary file 1 [file Table_1.xlsx]

## Sheet: Sheet1
List of MsMYB transcription factors identified in M. sieversii.
	pI	MW	gene	Pep	family	group
>MS01G21330.1	9.52	11040.5	294	97	1R	1R-4
>MS01G12500.1	5.03	75324.1	2055	684	1R	1R-23
>MS01G23830.1	8.27	33681.6	939	312	1R	1R-20
>MS01G02030.1	9	10914.2	291	96	1R	1R-4
>MS01G04910.1	6.82	31782.5	858	285	R2R3	R2R3-21
>MS01G23890.1	6.48	77046.6	2046	681	1R	1R-33
>MS01G04990.1	6.1	42487.5	1161	386	1R	1R-10
>MS01G06050.1	7.68	34468.9	954	317	1R	1R-20
>MS01G22820.1	6.44	41978.1	1149	382	1R	1R-8
>MS01G03020.1	5.48	159997	4227	1408	1R	1R-45
>MS01G28910.1	5.54	90192.5	2478	825	1R	1R-9
>MS01G25500.1	10.11	58775.2	1581	526	1R	1R-9
>MS01G16590.1	9.42	34841.1	960	319	1R	1R-3
>MS01G17500.1	6.57	37155.4	984	327	R2R3	R2R3-5
>MS01G13640.1	9.15	29265.9	774	257	R2R3	R2R3-6
>MS01G32220.1	6.85	63640.8	1812	603	1R	1R-30
>MS01G03890.1	5.41	18728.2	498	165	1R	1R-17
>MS01G17070.1	5.93	33079.2	912	303	1R	1R-1
>MS01G03930.1	5.73	32590.5	885	294	1R	1R-9
>MS01G25130.1	5.7	42326.7	1140	379	R2R3	R2R3-24
>MS01G02720.1	7.87	37417.7	1017	338	1R	1R-8
>MS01G16290.1	5.62	28106.4	771	256	R2R3	R2R3-21
>MS01G21230.1	9	9357.46	249	82	1R	1R-4
>MS01G01950.1	9.26	11667	315	104	1R	1R-4
>MS01G14590.1	6.79	53312.7	1470	489	1R	1R-8
>MS01G34070.1	9.21	35096.4	939	312	R2R3	R2R3-2
>MS01G05230.1	4.55	49608.2	1308	435	R1	1R-18
>MS01G07680.1	5.43	113540	3102	1033	3R	3R
>MS01G03880.1	9.59	23071.2	600	199	R2R3	R2R3-6
>MS01G26840.1	5.99	38525.3	1041	346	R2R3	R2R3-9
>MS01G30830.1	5.38	34861.4	939	312	1R	1R-10
>MS01G06990.1	8.9	25840.7	717	238	1R	1R-20
>MS01G24700.1	9.72	33204.3	918	305	1R	1R-1
>MS01G03000.1	6.26	68990.8	1857	618	1R	1R-23
>MS01G03920.1	9.1	31819.2	831	276	R2R3	R2R3-5
>MS10G17750.1	4.56	51294	1383	460	1R	1R-7
>MS10G15090.1	8.89	6763.96	171	56	1R	1R-6
>MS10G00330.1	4.39	12528.1	330	109	1R	1R-4
>MS10G18160.1	6.28	42882.3	1170	389	R2R3	R2R3-11
>MS10G10390.1	6.15	52979.1	1458	485	1R	1R-24
>MS10G20890.1	8.83	46265.3	1227	408	R2R3	R2R3-15
>MS10G17230.1	5.99	20656.4	528	175	1R	1R-17
>MS10G15510.1	7.59	29022.4	762	253	R2R3	R2R3-8
>MS10G01990.1	8.3	24099.3	621	206	1R	1R-15
>MS10G02000.1	8.97	28674.1	732	243	1R	1R-15
>MS10G09660.1	9.35	13398.1	348	115	1R	1R-12
>MS10G09090.1	8.67	32139.4	861	286	1R	1R-9
>MS10G07300.1	7.24	38181.7	1056	351	1R	1R-3
>MS10G13010.1	5.01	33316.8	906	301	1R	1R-8
>MS10G15550.1	5.78	41393.3	1104	367	R2R3	R2R3-10
>MS10G05150.1	6.19	12820.1	333	110	1R	1R-50
>MS10G02390.1	8.87	26914.5	720	239	R2R3	R2R3-1
>MS10G10330.1	8.55	22226.8	588	195	1R	1R-12
>MS10G09110.1	9.51	25437.5	672	223	R2R3	R2R3-6
>MS10G19980.1	6.8	60359.3	1605	534	1R	1R-20
>MS10G08690.1	8.74	31187.8	849	282	1R	1R-1
>MS10G19050.1	5.74	61968.4	1662	553	1R	1R-15
>MS10G00670.1	4.51	27720.2	744	247	1R	1R-29
>MS10G18380.1	8.73	38156.6	1029	342	R2R3	R2R3-14
>MS10G01970.1	8.44	41368.8	1125	374	1R	1R-8
>MS10G03860.1	6.14	58474.5	1605	534	1R	1R-5
>MS10G09020.1	6.17	75141.9	2055	684	1R	1R-1
>MS10G12140.1	6.93	25673.6	675	224	1R	1R-8
>MS10G16420.1	6.32	11242.5	318	105	1R	1R-6
>MS10G08540.1	5.93	37269.7	1011	336	R2R3	R2R3-18
>MS10G13550.1	6.2	19414.2	516	171	1R	1R-38
>MS10G01320.1	5.95	53198.6	1461	486	1R	1R-5
>MS10G19920.1	6.3	22327	588	195	R2R3	R2R3-25
>MS10G14880.1	5.93	53917.1	1485	494	R2R3	R2R3-29
>MS10G13060.1	8.13	47787.9	1239	412	1R	1R-11
>MS10G01640.1	5.24	30803.5	822	273	R2R3	R2R3-15
>MS11G04780.1	6.64	35564.2	969	322	1R	1R-15
>MS11G17960.1	7.36	44561.1	1203	400	1R	1R-8
>MS11G08470.1	5.82	38903.3	1029	342	1R	1R-10
>MS11G11780.1	6.06	39961.6	1059	352	R2R3	R2R3-18
>MS11G04050.1	6.12	41624.8	1125	374	R2R3	R2R3-14
>MS11G14040.1	6.02	12533.7	333	110	1R	1R-17
>MS11G16850.1	6.46	68354.1	1824	607	1R	1R-23
>MS11G05640.1	7.01	25944.1	687	228	R2R3	R2R3-7
>MS11G07930.1	5.1	62057.6	1692	563	1R	1R-9
>MS11G06230.1	5.69	42209.8	1125	374	R2R3	R2R3-16
>MS11G01270.1	9.6	22423.4	600	199	R2R3	R2R3-1
>MS11G17140.1	6.21	39610.6	1077	358	R2R3	R2R3-9
>MS11G00680.1	7.68	46383.3	1287	428	1R	1R-8
>MS11G14500.1	9.38	16508.7	432	143	1R	1R-12
>MS11G00520.1	7.24	32187.6	834	277	1R	1R-19
>MS11G10630.1	8.03	10978.4	279	92	1R	1R-6
>MS11G15460.1	6.85	23274.1	624	207	R2R3	R2R3-6
>MS11G01280.1	9.28	21216.2	561	186	R2R3	R2R3-1
>MS11G18430.1	8.68	33114.3	867	288	1R	1R-31
>MS11G00390.1	6.92	50331.6	1386	461	R2R3	R2R3-3
>MS11G01940.1	6.02	33883.9	879	292	R2R3	R2R3-26
>MS11G02400.1	8.58	33094.9	921	306	1R	1R-2
>MS11G03830.1	7.31	35983.4	975	324	R2R3	R2R3-11
>MS11G15390.1	6.5	35633.4	987	328	1R	1R-3
>MS11G11990.1	5.61	65961	1752	583	1R	1R-7
>MS11G05770.1	6.5	55046.1	1458	485	1R	1R-20
>MS11G07520.1	7.62	100966	2754	917	1R	1R-11
>MS11G16740.1	7.73	35171.1	951	316	1R	1R-20
>MS12G13380.1	9.62	25558.7	678	225	R2R3	R2R3-6
>MS12G21120.1	7.24	49530.8	1347	448	1R	1R-8
>MS12G21810.1	5.32	30975.6	828	275	R2R3	R2R3-15
>MS12G06870.1	5.87	32184.7	843	280	1R	1R-15
>MS12G07700.1	5.66	57076.7	1581	526	R2R3	R2R3-29
>MS12G02420.1	6.74	59539.5	1590	529	1R	1R-20
>MS12G06790.1	6	41471.4	1104	367	R2R3	R2R3-10
>MS12G13750.1	5.94	41342.3	1122	373	R2R3	R2R3-18
>MS12G01310.1	5.47	46702	1257	418	1R	1R-10
>MS12G22910.1	5.59	16035.5	417	138	1R	1R-4
>MS12G05170.1	9.54	32507.7	873	290	1R	1R-5
>MS12G03230.1	6.31	39850.5	1080	359	R2R3	R2R3-12
>MS12G03990.1	6.14	42631.1	1170	389	R2R3	R2R3-11
>MS12G11670.1	9.37	43554.2	1158	385	1R	1R-43
>MS12G03750.1	6.8	37814	1029	342	R2R3	R2R3-14
>MS12G05890.1	9.34	50330.5	1350	449	1R	1R-14
>MS12G14760.1	7.2	38676.4	1071	356	1R	1R-3
>MS12G09720.1	4.95	32935.8	885	294	1R	1R-8
>MS12G21090.1	9.38	23414.7	603	200	1R	1R-15
>MS12G04530.1	4.44	52733.4	1419	472	1R	1R-7
>MS12G02480.1	6.52	22308	588	195	R2R3	R2R3-25
>MS12G15610.1	4.69	45193.2	1194	397	1R	1R-11
>MS12G20590.1	6.68	34032	876	291	1R	1R-12
>MS12G07430.1	4.38	8718.29	231	76	1R	1R-6
>MS12G21940.1	6.06	52550	1452	483	1R	1R-5
>MS12G13400.1	6.34	32496.6	867	288	R2R3	R2R3-5
>MS12G22520.1	5.05	32892.2	873	290	R2R3	R2R3-26
>MS12G05070.1	8.22	27356.8	708	235	R2R3	R2R3-27
>MS12G12630.1	6.18	51120.1	1398	465	1R	1R-24
>MS12G13440.1	6.89	67848.3	1869	622	1R	1R-1
>MS12G01420.1	5.33	32485.4	858	285	R2R3	R2R3-15
>MS12G08960.1	6.71	63070.5	1677	558	1R	1R-39
>MS12G18720.1	6.53	58974.3	1614	537	1R	1R-5
>MS13G00500.1	9.3	50753.9	1350	449	1R	1R-13
>MS13G09090.1	5.46	185227	5088	1695	R2R3	R2R3-5
>MS13G02710.1	5.99	38060.7	1026	341	R2R3	R2R3-9
>MS13G10520.1	6.14	28439.5	777	258	1R	1R-1
>MS13G12040.1	9.63	26110.7	699	232	1R	1R-11
>MS13G11980.1	6.01	28420.6	780	259	1R	1R-12
>MS13G05820.1	9.05	31408.4	861	286	1R	1R-5
>MS13G01390.1	5.95	22034.8	585	194	1R	1R-40
>MS13G01400.1	8.6	11859.6	303	100	1R	1R-10
>MS13G15110.1	5.56	98951.5	2712	903	1R	1R-23
>MS13G03930.1	10.43	48302.2	1302	433	R2R3	R2R3-5
>MS13G07830.1	5.52	85464.3	2352	783	1R	1R-5
>MS13G05480.1	5.52	72330.4	1914	637	1R	1R-7
>MS13G16090.1	7.75	34945.3	960	319	1R	1R-5
>MS13G04790.1	5.51	39180.7	1056	351	R2R3	R2R3-11
>MS13G07800.1	10.09	23062.7	606	201	1R	1R-5
>MS13G18280.1	6.34	33678.5	873	290	1R	1R-12
>MS13G13500.1	9.79	38149.9	1050	349	1R	1R-3
>MS13G07110.1	8.61	32278.3	864	287	R2R3	R2R3-3
>MS13G04180.1	5.87	59857.6	1602	533	1R	1R-5
>MS13G11360.1	5.77	32613.3	852	283	1R	1R-2
>MS13G11200.1	6.51	45268	1239	412	1R	1R-20
>MS13G18390.1	6.4	50464.1	1365	454	R2R3	R2R3-9
>MS13G15410.1	9.18	7772.06	207	68	1R	1R-11
>MS13G16610.1	8.66	12170.9	303	100	1R	1R-6
>MS13G13640.1	6.03	32609.2	864	287	1R	1R-15
>MS13G14200.1	5.06	28430.7	756	251	R2R3	R2R3-15
>MS13G06600.1	9.73	11112.6	279	92	1R	1R-6
>MS13G12100.1	8.26	42322.9	1140	379	1R	1R-8
>MS14G13670.1	9.53	29336.3	774	257	1R	1R-24
>MS14G11870.1	9.08	72525.9	1950	649	1R	1R-1
>MS14G09420.1	7.3	86190.8	2337	778	1R	1R-9
>MS14G04950.1	9.28	76227.6	2052	683	1R	1R-6
>MS14G13230.1	7.17	34273.2	915	304	1R	1R-2
>MS14G05000.1	7.99	47649.1	1278	425	1R	1R-24
>MS14G09280.1	9.31	47552.2	1275	424	R2R3	R2R3-22
>MS14G01290.1	9.5	9968.6	267	88	1R	1R-10
>MS14G10520.1	8.99	31383.4	849	282	1R	1R-5
>MS14G09080.1	5.46	27503.6	711	236	R2R3	R2R3-20
>MS14G15980.1	8.34	46497.5	1242	413	R2R3	R2R3-16
>MS14G07400.1	6.32	34080.1	951	316	1R	1R-5
>MS14G08170.1	8.78	31520.5	873	290	1R	1R-24
>MS14G18850.1	5.68	73903.9	1974	657	1R	1R-32
>MS14G19580.1	5.24	109777	2937	978	1R	1R-25
>MS14G00230.1	7.77	52104.4	1413	470	1R	1R-24
>MS14G13700.1	8.35	35422.8	891	296	1R	1R-11
>MS14G20210.1	6.54	88817.5	2409	802	1R	1R-21
>MS14G11720.1	7.8	64028.7	1764	587	R2R3	R2R3-18
>MS14G09590.1	8.55	57270	1518	505	1R	1R-1
>MS14G01180.1	8.25	43643.5	1206	401	1R	1R-19
>MS14G13140.1	9.1	61412.1	1656	551	1R	1R-7
>MS14G11800.1	9.36	40450.9	1065	354	1R	1R-14
>MS14G12850.1	5.42	42801.5	1170	389	1R	1R-20
>MS15G14170.1	4.81	20964.1	579	192	1R	1R-40
>MS15G02380.1	9.31	29657.4	786	261	R2R3	R2R3-2
>MS15G07580.1	5.69	85686.5	2361	786	1R	1R-9
>MS15G14090.1	6.11	46349.6	1254	417	R2R3	R2R3-23
>MS15G17390.1	8.92	10868.2	288	95	1R	1R-4
>MS15G05650.1	7.26	45141.6	1206	401	1R	1R-15
>MS15G16790.1	6.74	37402.6	1017	338	1R	1R-8
>MS15G17450.1	9.26	11228.6	303	100	1R	1R-4
>MS15G18460.1	5.52	35073.1	933	310	1R	1R-28
>MS15G15540.1	6.03	69420.1	1878	625	1R	1R-23
>MS15G14590.1	4.99	30276	828	275	1R	1R-52
>MS15G10860.1	5.18	111931	3063	1020	3R	3R
>MS15G12930.1	8.67	34631.1	960	319	1R	1R-20
>MS15G11830.1	9.18	26338.1	729	242	1R	1R-20
>MS15G14580.1	5.27	27937.4	744	247	1R	1R-15
>MS15G15560.1	5.79	156934	4122	1373	1R	1R-45
>MS15G04260.1	8.74	65626.6	1857	618	1R	1R-30
>MS16G19900.1	6.83	36623	978	325	R2R3	R2R3-13
>MS16G06070.1	6.66	26972	711	236	R2R3	R2R3-7
>MS16G08730.1	5.8	39612.1	1038	345	1R	1R-10
>MS16G08280.1	5.19	62272.9	1692	563	1R	1R-9
>MS16G05460.1	6.6	32661.3	903	300	1R	1R-3
>MS16G01400.1	7.82	109915	2928	975	4R	4R
>MS16G01880.1	5.61	34361.5	900	299	R2R3	R2R3-26
>MS16G04000.1	8.5	35371	954	317	R2R3	R2R3-11
>MS16G12000.1	5.17	66622.5	1770	589	1R	1R-7
>MS16G13220.1	8.27	31511.3	873	290	1R	1R-24
>MS16G15410.1	5.46	118163	3183	1060	1R	1R-28
>MS16G00540.1	6.61	48525.7	1326	441	1R	1R-44
>MS14G11720.1	5.72	39536.2	1047	348	3R	3R
>MS16G02360.1	6.88	33080.8	924	307	1R	1R-2
>MS16G10100.1	6.45	24130.9	639	212	1R	1R-9
>MS16G04270.1	7.29	50634.8	1374	457	R2R3	R2R3-14
>MS16G05080.1	6.06	39626.8	1074	357	R2R3	R2R3-12
>MS16G01350.1	9.76	20986.9	561	186	R2R3	R2R3-1
>MS16G06100.1	6.45	26761.8	705	234	R2R3	R2R3-7
>MS16G06660.1	5.41	41524.2	1113	370	R2R3	R2R3-16
>MS16G08180.1	9.26	24779.7	639	212	1R	1R-12
>MS16G09130.1	5.3	79129.5	2184	727	1R	1R-26
>MS16G01340.1	9.39	21848.6	591	196	R2R3	R2R3-1
>MS16G00650.1	8.49	31689.2	816	271	1R	1R-19
>MS16G16210.1	9.1	75009	2025	674	1R	1R-6
>MS16G07770.1	8.63	87781.2	2388	795	1R	1R-11
>MS16G00800.1	6.35	45449.1	1266	421	1R	1R-8
>MS16G20680.1	7.3	49912	1350	449	1R	1R-24
>MS16G12870.1	8.95	11945.3	312	103	1R	1R-12
>MS16G19970.1	8.89	44195.1	1221	406	1R	1R-19
>MS16G06240.1	7.01	60844.9	1605	534	1R	1R-20
>MS16G03560.1	4.51	58005.4	1536	511	1R	1R-7
>MS17G08410.1	5.29	42854.7	1176	391	1R	1R-20
>MS17G07990.1	6.09	34713.8	924	307	1R	1R-2
>MS17G08040.1	8.39	52775.2	1422	473	1R	1R-7
>MS17G16460.1	8.05	77891.8	2055	684	1R	1R-34
>MS17G14370.1	6.31	35608.4	987	328	1R	1R-3
>MS17G07050.1	8.76	36937.9	987	328	1R	1R-8
>MS17G01450.1	5.18	109672	2937	978	1R	1R-25
>MS17G00880.1	9.16	40681.5	1092	363	1R	1R-21
>MS17G14430.1	9.28	22356.1	594	197	R2R3	R2R3-6
>MS17G01300.1	5.74	53332.2	1425	474	1R	1R-24
>MS17G05230.1	8.52	46087.1	1245	414	R2R3	R2R3-16
>MS17G03570.1	9.28	129509	3510	1169	1R	1R-6
>MS17G01460.1	9.55	10897.7	282	93	1R	1R-10
>MS17G14020.1	8.71	51778.9	1389	462	3R	3R
>MS17G09370.1	8.87	72872.2	1968	655	1R	1R-1
>MS17G09450.1	9.38	40536.4	1062	353	1R	1R-14
>MS17G02130.1	5.91	75054.3	1980	659	1R	1R-32
>MS17G18620.1	5.7	33315.8	924	307	1R	1R-24
>MS17G15750.1	7.06	26942.5	735	244	1R	1R-9
>MS17G09480.1	6.55	56547.2	1551	516	3R	3R
>MS17G07500.1	7.82	34785.2	864	287	1R	1R-11
>MS17G11850.1	8.7	37009.5	993	330	R2R3	R2R3-22
>MS17G12080.1	5.14	26357.4	681	226	1R	1R-15
>MS17G10630.1	8.48	28337.1	765	254	1R	1R-5
>MS17G14850.1	9.25	39278.5	1065	354	1R	1R-46
>MS17G01000.1	7.7	28932	759	252	R2R3	R2R3-7
>MS17G12940.1	5.01	33873.5	909	302	R2R3	R2R3-15
>MS02G06240.1	4.94	108617	3012	1003	1R	1R-9
>MS02G01890.1	5.66	74379.1	1998	665	1R	1R-18
>MS02G01900.1	8.07	64620.7	1719	572	1R	1R-18
>MS02G15760.1	5.62	53551.6	1458	485	1R	1R-24
>MS02G21910.1	10.14	16370.1	414	137	1R	1R-10
>MS02G05780.1	8.89	11478.8	309	102	1R	1R-4
>MS02G26050.1	8.53	27120.5	720	239	R2R3	R2R3-8
>MS02G23900.1	5.06	34250	924	307	1R	1R-11
>MS02G14450.1	9.33	33013.5	876	291	1R	1R-22
>MS02G18760.1	8.49	40854.2	1101	366	1R	1R-24
>MS02G27260.1	8.8	34256.7	921	306	1R	1R-8
>MS02G26000.1	6.27	40543.9	1059	352	R2R3	R2R3-10
>MS02G00880.1	9.33	40161.3	1056	351	1R	1R-19
>MS02G28270.1	6.8	62940.9	1683	560	1R	1R-21
>MS02G26730.1	4.45	8448.17	225	74	1R	1R-9
>MS02G28720.1	6.39	34038.6	945	314	1R	1R-24
>MS02G25610.1	9.8	53138	1428	475	1R	1R-48
>MS02G14440.1	6.3	222193	6129	2042	1R	1R-28
>MS02G13300.1	8.52	74260.7	1953	650	1R	1R-42
>MS02G18120.1	9.73	19096.6	513	170	R2R3	R2R3-8
>MS02G07080.1	8.37	44195.6	1191	396	1R	1R-8
>MS02G27010.1	5.39	52353.7	1446	481	1R	1R-6
>MS02G20450.1	8.77	20513.1	534	177	1R	1R-12
>MS02G23800.1	7.71	45169.3	1188	395	1R	1R-8
>MS02G28730.1	6.81	33765	921	306	1R	1R-24
>MS02G19340.1	5.39	31382.3	837	278	R2R3	R2R3-19
>MS02G08300.1	6.56	33124	909	302	1R	1R-20
>MS02G10740.1	8.94	28396.2	768	255	R2R3	R2R3-2
>MS02G16350.1	5.29	30880.5	825	274	R2R3	R2R3-8
>MS02G01470.1	6.34	33811.6	873	290	1R	1R-12
>MS02G28500.1	5.62	46652.1	1254	417	1R	1R-10
>MS02G18820.1	6.62	36984.2	987	328	R2R3	R2R3-19
>MS03G13880.1	7.72	31871.1	837	278	1R	1R-22
>MS03G18790.1	4.96	37561.7	1002	333	R2R3	R2R3-19
>MS03G27920.1	6.43	33619.7	921	306	1R	1R-24
>MS03G19690.1	7.73	19039.3	498	165	1R	1R-12
>MS03G19210.1	7.31	259848	7071	2356	1R	1R-37
>MS03G01690.1	8.7	63550.2	1692	563	1R	1R-18
>MS03G08820.1	9.6	40848.8	1098	365	1R	1R-1
>MS03G07170.1	8.59	44011.3	1179	392	1R	1R-8
>MS03G01680.1	6.29	74570.5	1998	665	1R	1R-18
>MS03G12830.1	8.78	74489.1	1953	650	1R	1R-22
>MS03G18090.1	7.73	39980	1086	361	1R	1R-24
>MS03G17360.1	4.83	40643.6	1098	365	R2R3	R2R3-8
>MS03G13870.1	6.3	219893	6063	2020	1R	1R-28
>MS03G25050.1	8.19	26929.3	714	237	R2R3	R2R3-8
>MS03G08830.1	9.46	38549.1	1044	347	1R	1R-1
>MS03G15100.1	5.35	54374.5	1488	495	1R	1R-24
>MS03G26030.1	5.22	54553	1503	500	1R	1R-6
>MS03G18140.1	6.18	35085.3	927	308	1R	1R-14
>MS03G15710.1	5.12	30458.7	804	267	R2R3	R2R3-8
>MS03G17470.1	5.49	197532	5199	1732	1R	1R-41
>MS03G27490.1	6.6	62630.3	1680	559	1R	1R-35
>MS03G00730.1	9.34	40839.9	1071	356	1R	1R-19
>MS03G05270.1	4.62	18129.5	486	161	1R	1R-28
>MS03G22870.1	9.22	45513.7	1188	395	1R	1R-8
>MS03G06010.1	4.82	108216	3000	999	1R	1R-9
>MS03G24980.1	6.23	41507.1	1086	361	R2R3	R2R3-10
>MS03G10170.1	8.89	28272.2	768	255	R2R3	R2R3-2
>MS03G22920.1	5.09	34800.7	954	317	1R	1R-11
>MS03G26300.1	8.99	37843.6	1017	338	1R	1R-8
>MS03G05810.1	8.93	11192.5	303	100	1R	1R-4
>MS03G05560.1	5.05	79100.4	2139	712	1R	1R-7
>MS04G21420.1	10.17	16886.7	444	147	R2R3	R2R3-23
>MS04G23060.1	6.02	33604.2	936	311	1R	1R-24
>MS04G07350.1	7.1	25952.2	681	226	R2R3	R2R3-7
>MS04G06050.1	6.2	52976.4	1410	469	1R	1R-15
>MS04G08780.1	5.9	43970.3	1152	383	1R	1R-10
>MS04G01070.1	9.12	31173	846	281	1R	1R-8
>MS04G12360.1	7.04	39811.4	1086	361	R2R3	R2R3-4
>MS04G05650.1	8.09	49811.8	1359	452	1R	1R-19
>MS04G02770.1	10.24	10886.5	282	93	1R	1R-5
>MS04G00220.1	6.84	31183.7	876	291	1R	1R-2
>MS04G01590.1	6.02	61774.9	1710	569	1R	1R-23
>MS04G11620.1	5.94	39923.8	1062	353	R2R3	R2R3-26
>MS04G06630.1	9.97	35210.5	972	323	1R	1R-3
>MS04G05040.1	4.55	59419.9	1584	527	1R	1R-7
>MS04G10310.1	5.69	37736.1	1008	335	1R	1R-10
>MS04G08630.1	5.85	68827.3	1845	614	1R	1R-23
>MS04G05520.1	6.46	42089.1	1146	381	R2R3	R2R3-11
>MS04G02290.1	9.17	22867.8	609	202	R2R3	R2R3-1
>MS04G18020.1	9.33	30642.5	795	264	R2R3	R2R3-28
>MS04G03650.1	6.66	41467.9	1131	376	1R	1R-8
>MS04G13600.1	5.49	124813	3240	1079	1R	1R-27
>MS04G20610.1	8.74	29240.1	792	263	1R	1R-9
>MS04G17020.1	5.05	28865	771	256	R2R3	R2R3-8
>MS04G03120.1	6.06	33518.5	891	296	R2R3	R2R3-26
>MS04G12510.1	5.97	73084	2010	669	1R	1R-23
>MS05G02440.1	7.11	35911.8	984	327	1R	1R-15
>MS05G08620.1	6.65	23423.4	603	200	1R	1R-12
>MS05G07390.1	8.42	41313.3	1074	357	1R	1R-15
>MS05G01080.1	9.75	79050.4	2148	715	1R	1R-1
>MS05G06000.1	5.56	35289.9	990	329	1R	1R-47
>MS05G04990.1	6.55	55810.3	1518	505	1R	1R-20
>MS05G06250.1	9.26	76423.8	2073	690	1R	1R-1
>MS05G03190.1	5.01	81931.1	2256	751	1R	1R-38
>MS05G09380.1	6.51	39860.4	1062	353	R2R3	R2R3-22
>MS05G24000.1	4.91	53327.7	1464	487	R2R3	R2R3-4
>MS05G05170.1	9.34	34666.8	924	307	1R	1R-2
>MS05G16000.1	6.53	59551.8	1638	545	R2R3	R2R3-29
>MS05G14190.1	5.11	37974.2	1032	343	R2R3	R2R3-17
>MS05G15980.1	8.86	41040.7	1128	375	R2R3	R2R3-29
>MS06G10660.1	5.73	38522	1035	344	1R	1R-10
>MS06G21830.1	7.68	35615.9	954	317	1R	1R-9
>MS06G01620.1	5.72	72915.9	2013	670	1R	1R-23
>MS06G05720.1	6.41	42706.9	1167	388	R2R3	R2R3-11
>MS06G02960.1	5.53	85336.1	2286	761	1R	1R-23
>MS06G12090.1	5.95	39299.1	1050	349	R2R3	R2R3-26
>MS06G21660.1	6.89	43579.8	1161	386	R2R3	R2R3-23
>MS06G17950.1	8.31	25427.5	657	218	1R	1R-10
>MS06G18440.1	8.93	30340.2	792	263	R2R3	R2R3-28
>MS06G05220.1	4.45	57059.1	1530	509	1R	1R-7
>MS06G08950.1	5.94	71214.1	1914	637	1R	1R-23
>MS06G06920.1	9.27	33074.8	927	308	1R	1R-51
>MS06G05900.1	8.45	49759.1	1356	451	1R	1R-19
>MS06G03850.1	7.22	40834.3	1116	371	1R	1R-8
>MS06G06310.1	5.45	53053.2	1413	470	1R	1R-15
>MS06G03280.1	5.83	33124.8	897	298	R2R3	R2R3-26
>MS06G18380.1	9.21	27915.4	720	239	R2R3	R2R3-28
>MS06G23370.1	6.81	32710.7	867	288	1R	1R-24
>MS06G00210.1	6.84	31045.6	876	291	1R	1R-2
>MS06G01000.1	8.75	30751.5	840	279	1R	1R-8
>MS06G18450.1	9.33	29058.1	753	250	R2R3	R2R3-28
>MS06G13050.1	5.68	73520.4	2025	674	1R	1R-23
>MS06G12960.1	6.63	41258.1	1128	375	R2R3	R2R3-4
>MS06G23020.1	8.61	45175.9	1212	403	1R	1R-8
>MS06G14070.1	6.53	33615.4	873	290	1R	1R-12
>MS06G17550.1	5.46	30517.9	813	270	R2R3	R2R3-8
>MS06G07680.1	8.84	25104.3	654	217	R2R3	R2R3-7
>MS06G22120.1	9.81	27468.6	720	239	R2R3	R2R3-9
>MS06G02480.1	8.76	26998.3	714	237	R2R3	R2R3-1
>MS06G21990.1	6.23	65114.4	1740	579	1R	1R-23
>MS06G14030.1	5.55	125982	3264	1087	1R	1R-27
>MS07G11240.1	8.79	33702	942	313	1R	1R-20
>MS07G00270.1	9.75	81197.1	2229	742	1R	1R-21
>MS07G12260.1	5.92	41544	1134	377	1R	1R-47
>MS07G20740.1	6.66	52420.8	1446	481	1R	1R-8
>MS07G18010.1	5.59	36743.2	1020	339	1R	1R-1
>MS07G04520.1	5.77	26300.4	693	230	1R	1R-2
>MS07G17650.1	6.14	38597.5	1011	336	R2R3	R2R3-5
>MS07G11560.1	8.85	96230.8	2571	856	1R	1R-31
>MS07G05420.1	6.14	65747.1	1710	569	1R	1R-26
>MS07G07980.1	7.67	33727.5	873	290	1R	1R-12
>MS07G02710.1	9.44	38787.9	1059	352	1R	1R-36
>MS07G10560.1	9.67	33762.7	924	307	1R	1R-1
>MS07G03560.1	5.5	59791.7	1662	553	R2R3	R2R3-29
>MS07G06760.1	5.25	60372.8	1632	543	1R	1R-23
>MS07G00820.1	5.83	38286	1014	337	R2R3	R2R3-17
>MS07G07700.1	7.51	38556.1	1014	337	1R	1R-15
>MS07G10130.1	7.61	42040.8	1140	379	R2R3	R2R3-24
>MS07G21710.1	8.79	29827.3	786	261	R2R3	R2R3-6
>MS07G08960.1	9.41	9211.54	240	79	1R	1R-49
>MS07G17630.1	8.12	35879.8	951	316	R2R3	R2R3-5
>MS07G18520.1	9.31	35264.6	966	321	1R	1R-3
>MS07G13530.1	9.3	10547	276	91	1R	1R-4
>MS07G13650.1	9	9357.46	249	82	1R	1R-4
>MS08G05720.1	9.15	75977.1	2064	687	1R	1R-1
>MS08G03260.1	4.97	88628.2	2442	813	1R	1R-1
>MS08G01100.1	9.73	78497.1	2127	708	1R	1R-36
>MS08G22690.1	5.2	53079.6	1458	485	R2R3	R2R3-4
>MS08G05480.1	5.82	35085.7	987	328	1R	1R-47
>MS08G16420.1	7.14	38601.4	1032	343	R2R3	R2R3-10
>MS08G08650.1	7.57	39654.2	1047	348	R2R3	R2R3-22
>MS08G04800.1	9.4	34639.9	924	307	1R	1R-2
>MS08G02430.1	6.42	36848.4	990	329	R2R3	R2R3-15
>MS08G12940.1	5.03	38474.7	1044	347	R2R3	R2R3-17
>MS08G04680.1	6.86	54645.1	1482	493	1R	1R-20
>MS08G00390.1	6.7	39915.2	1125	374	1R	1R-5
>MS08G06560.1	8.62	27008.5	720	239	1R	1R-15
>MS09G19520.1	5.71	80942.3	2220	739	1R	1R-23
>MS09G00270.1	9.87	77879.6	2133	710	1R	1R-21
>MS09G04570.1	5.69	64791.9	1701	566	1R	1R-26
>MS09G15230.1	8.99	74491.2	2025	674	1R	1R-1
>MS09G16740.1	5.69	27829.9	762	253	1R	1R-9
>MS09G13650.1	5.89	185653	5121	1706	1R	1R-9
>MS09G04090.1	6.25	26291.5	693	230	1R	1R-2
>MS09G15960.1	5.85	44803.3	1233	410	1R	1R-20
>MS09G18190.1	9.73	34172.6	936	311	1R	1R-3
>MS09G11860.1	9.16	33231.2	888	295	R2R3	R2R3-3
>MS09G16830.1	7.32	41634.2	1119	372	1R	1R-8
>MS09G18920.1	4.92	31300.8	840	279	R2R3	R2R3-15
>MS09G16780.1	9.36	27274.2	726	241	1R	1R-31
>MS09G03300.1	5.02	58909.4	1629	542	R2R3	R2R3-29
>MS09G11260.1	9.5	7843.97	198	65	1R	1R-6
>MS09G16980.1	8.69	24395.4	642	213	1R	1R-12
>MS09G10620.1	5.9	37566.9	1005	334	R2R3	R2R3-11
>MS09G16100.1	5.75	32682.3	861	286	1R	1R-2
>MS09G20590.1	7.73	38667.6	1056	351	1R	1R-5
>MS09G10100.1	5.36	78457.1	2085	694	1R	1R-7
>MS09G00860.1	5.7	38499.1	1026	341	R2R3	R2R3-17
>MS09G09840.1	9.08	38547.4	1056	351	1R	1R-5
>MS09G19870.1	6.81	33554.4	891	296	R2R3	R2R3-20
>MS09G21190.1	9.03	12163	300	99	1R	1R-6
>MS09G06990.1	8.55	32962.8	879	292	1R	1R-15
>MS18G00060.1	9.43	50156.3	1332	443	1R	1R-13
>MS20G00050.1	8.95	54018.2	1437	478	1R	1R-13
