# Supplementary material for: Genome-wide characterization and functional identification of MYB genes in Malus sieversii infected by Valsa mali
Source: Front Plant Sci. 2023 Apr 5;14:1112681. doi: 10.3389/fpls.2023.1112681 (PMC10113540; doi:10.3389/fpls.2023.1112681)
Supplement: Supplementary file 2 [file Table_2.xlsx]

## Sheet: Sheet1
Replication of MYB Family in Malus sieversii
ID	Subfamily	Type
MS01G21330.1	1R	WGD or Segmental
MS01G12500.1	1R	WGD or Segmental
MS01G23830.1	1R	WGD or Segmental
MS01G02030.1	1R	WGD or Segmental
MS01G23890.1	1R	Tandem
MS01G04990.1	1R	WGD or Segmental
MS01G06050.1	1R	WGD or Segmental
MS01G22820.1	1R	WGD or Segmental
MS01G03020.1	1R	WGD or Segmental
MS01G28910.1	1R	WGD or Segmental
MS01G25500.1	1R	WGD or Segmental
MS01G16590.1	1R	WGD or Segmental
MS01G32220.1	1R	WGD or Segmental
MS01G03890.1	1R	WGD or Segmental
MS01G17070.1	1R	WGD or Segmental
MS01G03930.1	1R	WGD or Segmental
MS01G02720.1	1R	WGD or Segmental
MS01G21230.1	1R	WGD or Segmental
MS01G01950.1	1R	WGD or Segmental
MS01G14590.1	1R	WGD or Segmental
MS01G05230.1	1R	Dispersed
MS01G30830.1	1R	WGD or Segmental
MS01G06990.1	1R	WGD or Segmental
MS01G24700.1	1R	WGD or Segmental
MS01G03000.1	1R	WGD or Segmental
MS10G17750.1	1R	WGD or Segmental
MS10G15090.1	1R	WGD or Segmental
MS10G00330.1	1R	WGD or Segmental
MS10G10390.1	1R	WGD or Segmental
MS10G17230.1	1R	WGD or Segmental
MS10G01990.1	1R	WGD or Segmental
MS10G02000.1	1R	Tandem
MS10G09660.1	1R	Dispersed
MS10G09090.1	1R	WGD or Segmental
MS10G07300.1	1R	WGD or Segmental
MS10G13010.1	1R	WGD or Segmental
MS10G05150.1	1R	Dispersed
MS10G10330.1	1R	Dispersed
MS10G19980.1	1R	WGD or Segmental
MS10G08690.1	1R	WGD or Segmental
MS10G19050.1	1R	WGD or Segmental
MS10G00670.1	1R	WGD or Segmental
MS10G01970.1	1R	WGD or Segmental
MS10G03860.1	1R	WGD or Segmental
MS10G09020.1	1R	WGD or Segmental
MS10G12140.1	1R	Dispersed
MS10G16420.1	1R	WGD or Segmental
MS10G13550.1	1R	Dispersed
MS10G01320.1	1R	WGD or Segmental
MS10G13060.1	1R	Singleton
MS11G04780.1	1R	WGD or Segmental
MS11G17960.1	1R	WGD or Segmental
MS11G08470.1	1R	WGD or Segmental
MS11G14040.1	1R	WGD or Segmental
MS11G16850.1	1R	WGD or Segmental
MS11G07930.1	1R	WGD or Segmental
MS11G00680.1	1R	WGD or Segmental
MS11G14500.1	1R	Dispersed
MS11G00520.1	1R	WGD or Segmental
MS11G10630.1	1R	WGD or Segmental
MS11G18430.1	1R	Dispersed
MS11G02400.1	1R	WGD or Segmental
MS11G15390.1	1R	WGD or Segmental
MS11G11990.1	1R	WGD or Segmental
MS11G05770.1	1R	WGD or Segmental
MS11G07520.1	1R	WGD or Segmental
MS11G16740.1	1R	WGD or Segmental
MS12G21120.1	1R	WGD or Segmental
MS12G06870.1	1R	WGD or Segmental
MS12G02420.1	1R	WGD or Segmental
MS12G01310.1	1R	Dispersed
MS12G22910.1	1R	WGD or Segmental
MS12G05170.1	1R	Dispersed
MS12G11670.1	1R	Dispersed
MS12G05890.1	1R	WGD or Segmental
MS12G14760.1	1R	WGD or Segmental
MS12G09720.1	1R	WGD or Segmental
MS12G21090.1	1R	WGD or Segmental
MS12G04530.1	1R	WGD or Segmental
MS12G15610.1	1R	WGD or Segmental
MS12G20590.1	1R	Dispersed
MS12G07430.1	1R	WGD or Segmental
MS12G21940.1	1R	WGD or Segmental
MS12G12630.1	1R	WGD or Segmental
MS12G13440.1	1R	WGD or Segmental
MS12G08960.1	1R	WGD or Segmental
MS12G18720.1	1R	WGD or Segmental
MS13G00500.1	1R	Dispersed
MS13G10520.1	1R	Dispersed
MS13G12040.1	1R	WGD or Segmental
MS13G11980.1	1R	WGD or Segmental
MS13G05820.1	1R	WGD or Segmental
MS13G01390.1	1R	WGD or Segmental
MS13G01400.1	1R	Dispersed
MS13G15110.1	1R	WGD or Segmental
MS13G07830.1	1R	Proximal
MS13G05480.1	1R	WGD or Segmental
MS13G16090.1	1R	WGD or Segmental
MS13G07800.1	1R	Proximal
MS13G18280.1	1R	Dispersed
MS13G13500.1	1R	WGD or Segmental
MS13G04180.1	1R	WGD or Segmental
MS13G11360.1	1R	WGD or Segmental
MS13G11200.1	1R	WGD or Segmental
MS13G15410.1	1R	WGD or Segmental
MS13G16610.1	1R	WGD or Segmental
MS13G13640.1	1R	Dispersed
MS13G06600.1	1R	WGD or Segmental
MS13G12100.1	1R	WGD or Segmental
MS14G13670.1	1R	WGD or Segmental
MS14G11870.1	1R	WGD or Segmental
MS14G09420.1	1R	Dispersed
MS14G04950.1	1R	WGD or Segmental
MS14G13230.1	1R	WGD or Segmental
MS14G05000.1	1R	Dispersed
MS14G01290.1	1R	WGD or Segmental
MS14G10520.1	1R	WGD or Segmental
MS14G07400.1	1R	Dispersed
MS14G08170.1	1R	WGD or Segmental
MS14G18850.1	1R	WGD or Segmental
MS14G19580.1	1R	WGD or Segmental
MS14G00230.1	1R	WGD or Segmental
MS14G13700.1	1R	WGD or Segmental
MS14G20210.1	1R	WGD or Segmental
MS14G09590.1	1R	WGD or Segmental
MS14G01180.1	1R	WGD or Segmental
MS14G13140.1	1R	WGD or Segmental
MS14G11800.1	1R	WGD or Segmental
MS14G12850.1	1R	WGD or Segmental
MS15G14170.1	1R	WGD or Segmental
MS15G07580.1	1R	WGD or Segmental
MS15G17390.1	1R	WGD or Segmental
MS15G05650.1	1R	WGD or Segmental
MS15G16790.1	1R	WGD or Segmental
MS15G17450.1	1R	WGD or Segmental
MS15G18460.1	1R	Dispersed
MS15G15540.1	1R	WGD or Segmental
MS15G14590.1	1R	Dispersed
MS15G12930.1	1R	WGD or Segmental
MS15G11830.1	1R	WGD or Segmental
MS15G14580.1	1R	WGD or Segmental
MS15G15560.1	1R	WGD or Segmental
MS15G04260.1	1R	WGD or Segmental
MS16G08730.1	1R	WGD or Segmental
MS16G08280.1	1R	WGD or Segmental
MS16G05460.1	1R	Dispersed
MS16G12000.1	1R	WGD or Segmental
MS16G13220.1	1R	WGD or Segmental
MS16G15410.1	1R	WGD or Segmental
MS16G00540.1	1R	WGD or Segmental
MS16G02360.1	1R	WGD or Segmental
MS16G10100.1	1R	WGD or Segmental
MS16G08180.1	1R	Dispersed
MS16G09130.1	1R	Dispersed
MS16G00650.1	1R	WGD or Segmental
MS16G16210.1	1R	WGD or Segmental
MS16G07770.1	1R	WGD or Segmental
MS16G00800.1	1R	WGD or Segmental
MS16G20680.1	1R	WGD or Segmental
MS16G12870.1	1R	Dispersed
MS16G19970.1	1R	WGD or Segmental
MS16G06240.1	1R	WGD or Segmental
MS16G03560.1	1R	WGD or Segmental
MS17G08410.1	1R	WGD or Segmental
MS17G07990.1	1R	WGD or Segmental
MS17G08040.1	1R	WGD or Segmental
MS17G16460.1	1R	Singleton
MS17G14370.1	1R	WGD or Segmental
MS17G07050.1	1R	WGD or Segmental
MS17G01450.1	1R	WGD or Segmental
MS17G00880.1	1R	Dispersed
MS17G01300.1	1R	WGD or Segmental
MS17G03570.1	1R	Singleton
MS17G01460.1	1R	WGD or Segmental
MS17G09370.1	1R	WGD or Segmental
MS17G09450.1	1R	WGD or Segmental
MS17G02130.1	1R	WGD or Segmental
MS17G18620.1	1R	WGD or Segmental
MS17G15750.1	1R	Dispersed
MS17G07500.1	1R	WGD or Segmental
MS17G12080.1	1R	WGD or Segmental
MS17G10630.1	1R	WGD or Segmental
MS17G14850.1	1R	WGD or Segmental
MS02G06240.1	1R	WGD or Segmental
MS02G01890.1	1R	WGD or Segmental
MS02G01900.1	1R	Tandem
MS02G15760.1	1R	WGD or Segmental
MS02G21910.1	1R	Tandem
MS02G05780.1	1R	WGD or Segmental
MS02G23900.1	1R	WGD or Segmental
MS02G14450.1	1R	WGD or Segmental
MS02G18760.1	1R	WGD or Segmental
MS02G27260.1	1R	WGD or Segmental
MS02G00880.1	1R	WGD or Segmental
MS02G28270.1	1R	WGD or Segmental
MS02G26730.1	1R	WGD or Segmental
MS02G28720.1	1R	WGD or Segmental
MS02G25610.1	1R	Dispersed
MS02G14440.1	1R	WGD or Segmental
MS02G13300.1	1R	WGD or Segmental
MS02G07080.1	1R	WGD or Segmental
MS02G27010.1	1R	WGD or Segmental
MS02G20450.1	1R	WGD or Segmental
MS02G23800.1	1R	WGD or Segmental
MS02G28730.1	1R	WGD or Segmental
MS02G08300.1	1R	WGD or Segmental
MS02G01470.1	1R	Dispersed
MS02G28500.1	1R	WGD or Segmental
MS03G13880.1	1R	WGD or Segmental
MS03G27920.1	1R	WGD or Segmental
MS03G19690.1	1R	WGD or Segmental
MS03G19210.1	1R	WGD or Segmental
MS03G01690.1	1R	Tandem
MS03G08820.1	1R	WGD or Segmental
MS03G07170.1	1R	WGD or Segmental
MS03G01680.1	1R	WGD or Segmental
MS03G12830.1	1R	WGD or Segmental
MS03G18090.1	1R	WGD or Segmental
MS03G13870.1	1R	WGD or Segmental
MS03G08830.1	1R	Tandem
MS03G15100.1	1R	WGD or Segmental
MS03G26030.1	1R	WGD or Segmental
MS03G18140.1	1R	WGD or Segmental
MS03G17470.1	1R	WGD or Segmental
MS03G27490.1	1R	WGD or Segmental
MS03G00730.1	1R	WGD or Segmental
MS03G05270.1	1R	Tandem
MS03G22870.1	1R	WGD or Segmental
MS03G06010.1	1R	WGD or Segmental
MS03G22920.1	1R	WGD or Segmental
MS03G26300.1	1R	WGD or Segmental
MS03G05810.1	1R	WGD or Segmental
MS03G05560.1	1R	WGD or Segmental
MS04G23060.1	1R	WGD or Segmental
MS04G06050.1	1R	WGD or Segmental
MS04G08780.1	1R	Dispersed
MS04G01070.1	1R	WGD or Segmental
MS04G05650.1	1R	WGD or Segmental
MS04G02770.1	1R	Dispersed
MS04G00220.1	1R	WGD or Segmental
MS04G01590.1	1R	WGD or Segmental
MS04G06630.1	1R	WGD or Segmental
MS04G05040.1	1R	WGD or Segmental
MS04G10310.1	1R	WGD or Segmental
MS04G08630.1	1R	WGD or Segmental
MS04G03650.1	1R	WGD or Segmental
MS04G13600.1	1R	WGD or Segmental
MS04G20610.1	1R	Dispersed
MS04G12510.1	1R	WGD or Segmental
MS05G02440.1	1R	WGD or Segmental
MS05G08620.1	1R	Dispersed
MS05G07390.1	1R	WGD or Segmental
MS05G01080.1	1R	WGD or Segmental
MS05G06000.1	1R	WGD or Segmental
MS05G04990.1	1R	WGD or Segmental
MS05G06250.1	1R	WGD or Segmental
MS05G03190.1	1R	WGD or Segmental
MS05G05170.1	1R	WGD or Segmental
MS06G10660.1	1R	WGD or Segmental
MS06G21830.1	1R	WGD or Segmental
MS06G01620.1	1R	WGD or Segmental
MS06G02960.1	1R	WGD or Segmental
MS06G17950.1	1R	Dispersed
MS06G05220.1	1R	WGD or Segmental
MS06G08950.1	1R	WGD or Segmental
MS06G06920.1	1R	WGD or Segmental
MS06G05900.1	1R	WGD or Segmental
MS06G03850.1	1R	WGD or Segmental
MS06G06310.1	1R	WGD or Segmental
MS06G23370.1	1R	WGD or Segmental
MS06G00210.1	1R	WGD or Segmental
MS06G01000.1	1R	WGD or Segmental
MS06G13050.1	1R	WGD or Segmental
MS06G23020.1	1R	WGD or Segmental
MS06G14070.1	1R	WGD or Segmental
MS06G21990.1	1R	WGD or Segmental
MS06G14030.1	1R	WGD or Segmental
MS07G11240.1	1R	WGD or Segmental
MS07G00270.1	1R	WGD or Segmental
MS07G12260.1	1R	WGD or Segmental
MS07G20740.1	1R	WGD or Segmental
MS07G18010.1	1R	WGD or Segmental
MS07G04520.1	1R	WGD or Segmental
MS07G11560.1	1R	WGD or Segmental
MS07G05420.1	1R	WGD or Segmental
MS07G07980.1	1R	Dispersed
MS07G02710.1	1R	WGD or Segmental
MS07G10560.1	1R	WGD or Segmental
MS07G06760.1	1R	WGD or Segmental
MS07G07700.1	1R	WGD or Segmental
MS07G08960.1	1R	Dispersed
MS07G18520.1	1R	WGD or Segmental
MS07G13530.1	1R	WGD or Segmental
MS07G13650.1	1R	WGD or Segmental
MS08G05720.1	1R	WGD or Segmental
MS08G03260.1	1R	WGD or Segmental
MS08G01100.1	1R	WGD or Segmental
MS08G05480.1	1R	WGD or Segmental
MS08G04800.1	1R	WGD or Segmental
MS08G04680.1	1R	WGD or Segmental
MS08G00390.1	1R	Dispersed
MS08G06560.1	1R	WGD or Segmental
MS09G19520.1	1R	WGD or Segmental
MS09G00270.1	1R	WGD or Segmental
MS09G04570.1	1R	WGD or Segmental
MS09G15230.1	1R	WGD or Segmental
MS09G16740.1	1R	WGD or Segmental
MS09G13650.1	1R	WGD or Segmental
MS09G04090.1	1R	WGD or Segmental
MS09G15960.1	1R	WGD or Segmental
MS09G18190.1	1R	WGD or Segmental
MS09G16830.1	1R	WGD or Segmental
MS09G16780.1	1R	WGD or Segmental
MS09G11260.1	1R	WGD or Segmental
MS09G16980.1	1R	Dispersed
MS09G16100.1	1R	WGD or Segmental
MS09G20590.1	1R	WGD or Segmental
MS09G10100.1	1R	WGD or Segmental
MS09G09840.1	1R	WGD or Segmental
MS09G21190.1	1R	WGD or Segmental
MS09G06990.1	1R	WGD or Segmental
MS18G00060.1	1R	WGD or Segmental
MS20G00050.1	1R	WGD or Segmental
MS01G04910.1	2R	WGD or Segmental
MS01G17500.1	2R	WGD or Segmental
MS01G13640.1	2R	WGD or Segmental
MS01G25130.1	2R	WGD or Segmental
MS01G16290.1	2R	WGD or Segmental
MS01G34070.1	2R	WGD or Segmental
MS01G03880.1	2R	WGD or Segmental
MS01G26840.1	2R	WGD or Segmental
MS01G03920.1	2R	WGD or Segmental
MS10G18160.1	2R	WGD or Segmental
MS10G20890.1	2R	WGD or Segmental
MS10G15510.1	2R	WGD or Segmental
MS10G15550.1	2R	WGD or Segmental
MS10G02390.1	2R	WGD or Segmental
MS10G09110.1	2R	WGD or Segmental
MS10G18380.1	2R	WGD or Segmental
MS10G08540.1	2R	WGD or Segmental
MS10G19920.1	2R	WGD or Segmental
MS10G14880.1	2R	WGD or Segmental
MS10G01640.1	2R	WGD or Segmental
MS11G11780.1	2R	WGD or Segmental
MS11G04050.1	2R	WGD or Segmental
MS11G05640.1	2R	WGD or Segmental
MS11G06230.1	2R	WGD or Segmental
MS11G01270.1	2R	WGD or Segmental
MS11G17140.1	2R	WGD or Segmental
MS11G15460.1	2R	WGD or Segmental
MS11G01280.1	2R	Tandem
MS11G00390.1	2R	WGD or Segmental
MS11G01940.1	2R	WGD or Segmental
MS11G03830.1	2R	WGD or Segmental
MS12G13380.1	2R	WGD or Segmental
MS12G21810.1	2R	WGD or Segmental
MS12G07700.1	2R	WGD or Segmental
MS12G06790.1	2R	WGD or Segmental
MS12G13750.1	2R	WGD or Segmental
MS12G03230.1	2R	WGD or Segmental
MS12G03990.1	2R	WGD or Segmental
MS12G03750.1	2R	WGD or Segmental
MS12G02480.1	2R	WGD or Segmental
MS12G13400.1	2R	WGD or Segmental
MS12G22520.1	2R	WGD or Segmental
MS12G05070.1	2R	WGD or Segmental
MS12G01420.1	2R	WGD or Segmental
MS13G09090.1	2R	WGD or Segmental
MS13G02710.1	2R	WGD or Segmental
MS13G03930.1	2R	WGD or Segmental
MS13G04790.1	2R	WGD or Segmental
MS13G07110.1	2R	WGD or Segmental
MS13G18390.1	2R	Dispersed
MS13G14200.1	2R	WGD or Segmental
MS14G09280.1	2R	WGD or Segmental
MS14G09080.1	2R	WGD or Segmental
MS14G15980.1	2R	WGD or Segmental
MS14G11720.1	2R	WGD or Segmental
MS15G02380.1	2R	WGD or Segmental
MS15G14090.1	2R	WGD or Segmental
MS16G19900.1	2R	WGD or Segmental
MS16G06070.1	2R	WGD or Segmental
MS16G01880.1	2R	WGD or Segmental
MS16G04000.1	2R	WGD or Segmental
MS16G04270.1	2R	WGD or Segmental
MS16G05080.1	2R	WGD or Segmental
MS16G01350.1	2R	Tandem
MS16G06100.1	2R	Proximal
MS16G06660.1	2R	WGD or Segmental
MS16G01340.1	2R	WGD or Segmental
MS17G14430.1	2R	WGD or Segmental
MS17G05230.1	2R	WGD or Segmental
MS17G11850.1	2R	WGD or Segmental
MS17G01000.1	2R	Dispersed
MS17G12940.1	2R	WGD or Segmental
MS02G26050.1	2R	Proximal
MS02G26000.1	2R	WGD or Segmental
MS02G18120.1	2R	WGD or Segmental
MS02G19340.1	2R	WGD or Segmental
MS02G10740.1	2R	WGD or Segmental
MS02G16350.1	2R	WGD or Segmental
MS02G18820.1	2R	WGD or Segmental
MS03G18790.1	2R	WGD or Segmental
MS03G17360.1	2R	WGD or Segmental
MS03G25050.1	2R	WGD or Segmental
MS03G15710.1	2R	WGD or Segmental
MS03G24980.1	2R	WGD or Segmental
MS03G10170.1	2R	WGD or Segmental
MS04G21420.1	2R	Dispersed
MS04G07350.1	2R	WGD or Segmental
MS04G12360.1	2R	WGD or Segmental
MS04G11620.1	2R	WGD or Segmental
MS04G05520.1	2R	WGD or Segmental
MS04G02290.1	2R	WGD or Segmental
MS04G18020.1	2R	WGD or Segmental
MS04G17020.1	2R	WGD or Segmental
MS04G03120.1	2R	WGD or Segmental
MS05G09380.1	2R	WGD or Segmental
MS05G24000.1	2R	WGD or Segmental
MS05G16000.1	2R	Proximal
MS05G14190.1	2R	WGD or Segmental
MS05G15980.1	2R	WGD or Segmental
MS06G05720.1	2R	WGD or Segmental
MS06G12090.1	2R	WGD or Segmental
MS06G21660.1	2R	WGD or Segmental
MS06G18440.1	2R	WGD or Segmental
MS06G03280.1	2R	WGD or Segmental
MS06G18380.1	2R	Proximal
MS06G18450.1	2R	Tandem
MS06G12960.1	2R	WGD or Segmental
MS06G17550.1	2R	WGD or Segmental
MS06G07680.1	2R	WGD or Segmental
MS06G22120.1	2R	Dispersed
MS06G02480.1	2R	WGD or Segmental
MS07G17650.1	2R	Proximal
MS07G03560.1	2R	WGD or Segmental
MS07G00820.1	2R	WGD or Segmental
MS07G10130.1	2R	WGD or Segmental
MS07G21710.1	2R	WGD or Segmental
MS07G17630.1	2R	WGD or Segmental
MS08G22690.1	2R	WGD or Segmental
MS08G16420.1	2R	WGD or Segmental
MS08G08650.1	2R	WGD or Segmental
MS08G02430.1	2R	WGD or Segmental
MS08G12940.1	2R	WGD or Segmental
MS09G11860.1	2R	WGD or Segmental
MS09G18920.1	2R	WGD or Segmental
MS09G03300.1	2R	WGD or Segmental
MS09G10620.1	2R	WGD or Segmental
MS09G00860.1	2R	WGD or Segmental
MS09G19870.1	2R	WGD or Segmental
MS01G07680.1	3R	WGD or Segmental
MS15G10860.1	3R	WGD or Segmental
MS14G11720.1	3R	WGD or Segmental
MS17G14020.1	3R	Dispersed
MS17G09480.1	3R	WGD or Segmental
MS16G01400.1	4R	Dispersed
