# Supplementary material for: Genome-wide characterization and functional identification of MYB genes in Malus sieversii infected by Valsa mali
Source: Front Plant Sci. 2023 Apr 5;14:1112681. doi: 10.3389/fpls.2023.1112681 (PMC10113540; doi:10.3389/fpls.2023.1112681)
Supplement: Supplementary file 3 [file Table_3.xlsx]

## Sheet: Sheet1
Expression level (FPKM value) of R2R3-MsMYBs detected by the transcriptome
QueryID	WW_0dpi_group_fpkm	WF_1dpi_group_fpkm	WF_2dpi_group_fpkm	WF_5dpi_group_fpkm
MS08G08650.1	0.651438	0.185387	0.291702	0.354409
MS04G05520.1	0	0	0	0
MS12G13380.1	1.17126	0.112381	0.0700722	0.103819
MS13G14200.1	0.0718937	0.00514385	0.234037	0.28487
MS12G21810.1	17.4926	0.902829	1.54366	1.35989
MS13G04790.1	0.0771495	0.0083165	0.0152456	0.0379243
MS13G07110.1	0.00961255	0	0	0
MS13G18390.1	1.2161	1.43026	1.68151	1.36629
MS07G21710.1	3.05885	2.81231	1.51989	0.191614
MS07G17650.1	0.0354901	0	0	0.0191576
MS07G17630.1	0.0999328	0	0	0.0555943
MS07G10130.1	0.0114063	0.00505803	0	0
MS07G03560.1	2.58207	2.32105	2.69129	2.56031
MS07G00820.1	0.146883	0	0	0.0226441
MS08G02430.1	0	0	0	0
MS08G12940.1	0.154643	0.123287	0.00324831	0.0114018
MS08G16420.1	0	0	0.199602	1.64332
MS08G22690.1	0	0.00306902	0	0.010514
MS17G14430.1	1.37541	0.179462	0.260368	0.441585
MS17G12940.1	0.309117	0.0344486	0.0156452	0.0386247
MS17G11850.1	1.09225	0.57444	0.863707	1.07508
MS17G05230.1	3.80434	6.26483	3.35168	1.34816
MS17G01000.1	0	0	0	0
MS02G10740.1	3.93834	0.210767	0.490519	1.02818
MS02G16350.1	2.86397	9.86814	32.1043	59.4089
MS02G18120.1	0.186121	0.0307293	0.205266	0.362078
MS02G18820.1	3.9888	0.701214	1.23569	2.61863
MS02G19340.1	0.00396941	0	0	0.00612272
MS02G26000.1	0.0723278	0.372842	0.0138094	0.0980491
MS02G26050.1	0.0359962	0.0181848	0.20715	0.781352
MS11G17140.1	0.00417951	0	0.0041347	0
MS11G15460.1	0	0	0	0
MS11G06230.1	6.98441	1.56381	2.97255	2.37095
MS11G05640.1	0.18854	0.00468635	0	0.00502239
MS11G04050.1	0.228923	0.264486	0.301504	0.110344
MS11G03830.1	0	0	0	0
MS11G01940.1	73.5959	27.013	50.3747	47.514
MS11G01280.1	17.7276	7.80398	11.0755	10.1552
MS11G01270.1	0.17796	0	0.00576823	0.00607754
MS09G00860.1	0.0555239	0	0	0.0140265
MS09G03300.1	6.28399	2.41609	4.24341	3.56101
MS09G10620.1	0.170618	0.244472	0.176118	0.912483
MS09G11860.1	5.7927	2.014	1.18108	1.6516
MS09G18920.1	0.127056	0.00435469	0.0178877	0
MS09G19870.1	1.0945	0.211778	0.155557	0.158906
MS01G03930.1	2.68393	0.01958	0.0638444	0.337002
MS15G14090.1	3.73695	2.10937	2.50729	1.77767
MS15G02380.1	2.33978	3.28085	2.8094	2.26338
MS10G20890.1	0.0259069	0	0	0.00527068
MS10G19920.1	0	0	0	0
MS10G18380.1	0.0904088	0.116765	0.314815	0.0952205
MS10G18160.1	0.00232284	0.0189506	0.0182794	0.0106937
MS10G15550.1	0.00815458	0.0053146	0	0
MS10G15510.1	0.547943	0.368626	0	0
MS10G14880.1	0.00177526	0	0	0
MS10G09110.1	8.9967	3.58689	8.36661	8.37995
MS10G09090.1	1.5831	0.03021	0.27249	0.653838
MS10G08540.1	0.00748684	0	0.00408914	0
MS10G02390.1	52.3738	30.8987	49.7763	48.1671
MS10G01640.1	0.0346427	0.122513	0.218812	0.530164
MS03G10170.1	14.8042	2.00375	2.6797	4.28061
MS03G15710.1	2.67235	0.242603	0.499598	4.84196
MS03G17360.1	0	0	0.0042718	0.0233935
MS03G18790.1	0.14078	0.0284269	0	0.0242786
MS03G24980.1	0.660023	0.302701	0.0331077	0.00842924
MS03G25050.1	0.0840246	0.85855	1.80801	3.19296
MS08G00390.1	0.25586	0.21981	0.199401	0.1715
MS05G09380.1	5.70366	2.88338	3.9364	2.34592
MS05G14190.1	0.0160079	0	0	0
MS05G15980.1	0.0203119	0.178382	0.0704066	0.413657
MS05G16000.1	0.00781842	0	0	0
MS05G24000.1	0	0	0.00317124	0
MS14G09080.1	4.08591	3.72813	5.28133	4.18037
MS14G09280.1	0.897807	0.0653174	0.174599	0.480543
MS14G15980.1	2.27943	0.402593	1.06321	1.21022
MS04G02290.1	12.6721	8.47097	14.9664	10.3458
MS04G03120.1	0.195126	0.0505367	0.807501	5.44381
MS04G07350.1	0	0	0	0
MS04G11620.1	1.37969	6.62935	15.2964	28.7638
MS04G12360.1	0	0	0	0
MS04G17020.1	0.100142	0	0.0674159	0.201491
MS04G18020.1	0.00493567	0.456268	0.960077	1.53046
MS04G21420.1	0	0.00471852	0	0
MS16G19900.1	0.0382731	0.125396	0.0192592	0.118372
MS16G11720.1	0.155883	0.0236765	0.0184639	0.0283835
MS16G06660.1	10.5258	2.54658	3.95577	1.75105
MS16G06100.1	0.00486612	0.0067518	0.00615272	0.0500436
MS16G05080.1	0	0	0	0
MS16G04270.1	0.0613625	0.00174574	0.0558105	0.0180257
MS16G04000.1	0	0	0	0
MS16G01880.1	53.0661	118.896	85.6547	75.7234
MS16G01350.1	8.06384	2.99759	3.54857	2.2619
MS16G01340.1	6.04355	0.391483	0.636209	0.341732
MS01G03880.1	0.472553	0.0252518	0.0297518	0.192024
MS01G03920.1	0.0713207	0	0.036917	0.323973
MS01G04910.1	5.98828	4.44279	3.38586	4.92622
MS01G13640.1	1.3009	0.0573821	0	0
MS01G16290.1	0.0170554	3.01538	3.81519	4.8631
MS01G17500.1	0.212362	0.0289316	0.200552	1.7476
MS01G25130.1	1.57045	0.656334	1.40199	1.67537
MS01G26840.1	0.179908	0.102646	0.00368455	0.0504974
MS01G34070.1	0.685868	6.42849	11.9371	15.175
MS06G02480.1	11.1819	23.0782	26.8067	31.4647
MS06G03280.1	16.1731	30.1016	34.2184	63.2845
MS06G05720.1	0	0.0221431	0	0.0161913
MS06G07680.1	0	0	0	0
MS06G12090.1	0.272097	3.38968	3.25131	10.3209
MS06G12960.1	0	0	0	0.0104801
MS06G17550.1	3.32552	5.27313	7.28274	8.59523
MS06G18380.1	0.0928847	0.0920745	0.243512	0.0101942
MS06G18440.1	0.226531	0.12386	0.377332	0
MS06G21660.1	0.0151458	0.00297299	0	0
MS06G22120.1	0	0	0	0
MS12G01420.1	0.0249236	0	0	0
MS12G02480.1	0	0	0	0
MS12G03230.1	0	0.00498925	0	0
MS12G03750.1	0.550855	2.06434	5.09652	2.72132
MS12G03990.1	0.324413	0.057981	0.134895	0.0938233
MS12G05070.1	0	0	0	0
MS12G06790.1	0.00678933	0.00442482	0	0
MS12G13750.1	0.0140254	0.0227123	0	0.0124556
MS12G22520.1	0.297365	1.19172	0.917627	1.45461
