# Supplementary material for: Genome-wide characterization and functional identification of MYB genes in Malus sieversii infected by Valsa mali
Source: Front Plant Sci. 2023 Apr 5;14:1112681. doi: 10.3389/fpls.2023.1112681 (PMC10113540; doi:10.3389/fpls.2023.1112681)
Supplement: Supplementary file 4 [file Table_4.xlsx]

## Sheet: Construction
Primer sequences used for construction
Gene name	Primer name	sequence
MYB14	P1307-MYB14-1F	CGGGATCCATGGGGAGAGCTCCTTGCTGTGAGA
	P1307-MYB14-1R	GCTCTAGATCAAAATTCTGGTAATTCTGGCGTT
MYB24	P1307-MYB24-1F	CGGGATCCATGTCGACTAAGACTAAAACCCTAA
	P1307-MYB24-1R	GCTCTAGACTACATTTCGTCCGTGTTCCATATG
MYB39	P1307-MYB39-1F	GCTCTAGAATGGGGAAAAATCCTTGTTGTGAGA
	P1307-MYB39-1R	GGGGTACCTCACAGAAGTTGGGTAACGTTTAAG
MYB78	P1307-MYB78-1F	CGGGATCCATGGACATGGCGAAAGGAAGCAGAG
	P1307-MYB78-1R	GCTCTAGATCAAATGCTGCTGAGATGCTGTTGT
MYB108	P1307-MYB108-1F	CGGGATCCATGGACATGGCGAAAGGAACCAGAG
	P1307-MYB108-1R	GCTCTAGATCAAATGTTGCTGAGCTGCTGTTGT

## Sheet: qRT-PCR
Primer sequences used for qRT-PCR
Gene name	Primer name	sequence
MYB14	Q-MYB14-1F	ACAATCGTCGTCAAGGGCGAAAACA
	Q-MYB14-1R	AGACCAAAACTAAAACCAAATTCCT
MYB24	Q-MYB24-1F	ACAGCCACAATATCGCCGCCACCAC
	Q-MYB24-1R	GCCACGTAGCAATCGCTGGCACAAT
MYB24	Q-MYB24-1F	ACAGCCACAATATCGCCGCCACCAC
	Q-MYB24-1R	GCCACGTAGCAATCGCTGGCACAAT
MYB78	Q-MYB78-1F	CTCACTGATTATTACACCCCTACTACTG
	Q-MYB78-1R	CACTGATAATTGTTGTTTTGCTCGT
MYB108	Q-MYB108-1F	GTATCACCTGTTTCCGACCTCACTG
	Q-MYB108-1R	TTCCACAAATTGTCCGATATGTCCC
